# Supplementary material for: Race and BMI modify associations of calcium and vitamin D intake with prostate cancer
Source: PubMed Central journal article supplement (PMC5248493; doi:10.1186/s12885-017-3060-8), 2017-01-19
Supplement: 12885_2017_3060_MOESM1_ESM.pdf [file 12885_2017_3060_MOESM1_ESM.pdf]

## Online Supplemental Material

**Supplemental Table 1** African American and European American Study Subjects' Characteristics

|                                                            | African Americans    | European Americans   | <i>P</i> |
|------------------------------------------------------------|----------------------|----------------------|----------|
| Age, mean (SD) <sup>1</sup>                                | 60.3 (10.1)          | 61.5 (8.1)           | 0.01     |
| Body Mass Index, mean (SD)                                 | 28.9 (5.7)           | 28.6 (5.5)           | 0.38     |
| Dietary Calcium Intake (mg/day), median (IQR) <sup>2</sup> | 497.5 (269.9-833.7)) | 485.6 (300.7-746.4)) | 0.05     |
| Supplemental Calcium Intake (mg/day), median (IQR)         | 5.4 (0.0-162.0)      | 56.0 (0.0-162.2)     | 0.02     |
| Total Calcium Intake (mg/day), median (IQR)                | 596.2 (328.7-1010.1) | 617.8 (393.7-1016.7) | 0.52     |
| Dietary Vitamin D Intake (IU/day), median (IQR)            | 75.9 (33.4-159.3)    | 61.2 (24.6-136.8)    | <0.001   |
| Supplemental Vitamin D Intake (IU/day), median (IQR)       | 0.0 (0.0-400.0)      | 350.0 (0.0-400.0)    | <0.001   |
| Total Vitamin D Intake (IU/day, median (IQR)               | 186.5 (59.4-463.4)   | 404.2 (71.6-652.2)   | <0.001   |
| Use Dietary Supplement, n (%)                              | 96 (14.9)            | 162 (26.1)           | <0.001   |
| Education, n (%)                                           |                      |                      | <0.001   |
| <High School or High School                                | 473 (59.9)           | 143 (23.1)           |          |
| Some College, 4 Years of College                           | 228 (28.9)           | 236 (38.2)           |          |
| Master, PhD, and Professional Degree                       | 89 (11.3)            | 239 (38.7)           |          |
| Income, n (%)                                              |                      |                      | <0.001   |
| <\$30,000                                                  | 412 (48.5)           | 84 (13.8)            |          |
| \$30,000-60,000                                            | 256 (30.2)           | 108 (17.7)           |          |
| ≥\$60,000                                                  | 181 (21.3)           | 418 (68.5)           |          |
| Married or Living Like Married, n (%)                      | 380 (43.2)           | 458 (74.0)           | <0.001   |
| Smoking, n (%)                                             |                      |                      | <0.001   |
| Current Smoker                                             | 219 (25.1)           | 48 (7.8)             |          |
| Yes, but Quit                                              | 295 (33.9)           | 247 (40.0)           |          |
| Alcohol Use, n (%)                                         |                      |                      | <0.001   |
| Yes, but Quit                                              | 223 (25.3)           | 92 (14.9)            |          |
| Currently Drink                                            | 445 (50.5)           | 483 (78.2)           |          |
| Family History, n (%)                                      | 141 (16.0)           | 117 (18.9)           | 0.15     |
| PSA, median (IQR)                                          |                      |                      |          |
| Cases                                                      | 7.5 (11.1)           | 5.0 (3.7)            | <0.001   |
| Controls                                                   | 1.1 (1.7)            | 1.2 (1.6)            | 0.47     |
| NCCN High Risk PCa <sup>4</sup> , n (%)                    | 105 (29.1)           | 35 (14.5)            | <0.001   |
| Gleason Score 4+3 or higher, n (%)                         | 83 (24.2)            | 58 (25.2)            | 0.84     |

<sup>1</sup> Standard Deviation (SD)

<sup>2</sup> Interquartile Range (IQR)

<sup>3</sup> Vitamin D International Unit (IU, 1 IU = 0.025 µg)

<sup>4</sup> Based on National Comprehensive Cancer Network (NCCN) risk stratification for biochemical failure.
