# Supplementary material for: Race and BMI modify associations of calcium and vitamin D intake with prostate cancer
Source: PubMed Central journal article supplement (PMC5248493; doi:10.1186/s12885-017-3060-8), 2017-01-19
Supplement: 12885_2017_3060_MOESM2_ESM.pdf [file 12885_2017_3060_MOESM2_ESM.pdf]

**Supplemental Table 2**  
Americans

Association of Dietary Calcium and Vitamin D Intake with Prostate Cancer in African Americans and European

|                                                          | Controls   |            | Cases vs. Controls |                  | NCCN High Risk vs. Controls |                  |                  | Gleason Score $\geq 4+3$ vs. Controls |                  |                  |
|----------------------------------------------------------|------------|------------|--------------------|------------------|-----------------------------|------------------|------------------|---------------------------------------|------------------|------------------|
|                                                          | n (%)      | n (%)      | Unadjusted         | Adjusted         | n (%)                       | Unadjusted       | Adjusted         | n (%)                                 | Unadjusted       | Adjusted         |
|                                                          |            |            | OR (95% C.I.)      | OR (95% C.I.)    |                             | OR (95% C.I.)    | OR (95% C.I.)    |                                       | OR (95% C.I.)    | OR (95% C.I.)    |
| <b><i>Dietary Calcium, mg/day</i></b>                    |            |            |                    |                  |                             |                  |                  |                                       |                  |                  |
| African Americans                                        |            |            |                    |                  |                             |                  |                  |                                       |                  |                  |
| Quartile 1 (<283.5)                                      | 132 (26.6) | 110 (28.1) | 1.00               | 1.00             | 25 (23.8)                   | 1.00             | 1.00             | 16 (19.3)                             | 1.00             | 1.00             |
| Quartile 2 (283.5-504.4)                                 | 117 (23.5) | 88 (22.5)  | 1.03 (0.71-1.49)   | 0.74 (0.47-1.18) | 19 (18.1)                   | 0.86 (0.45-1.64) | 0.80 (0.35-1.82) | 18 (21.7)                             | 1.27 (0.62-2.60) | 1.11 (0.46-2.69) |
| Quartile 3 (504.5-813.1)                                 | 120 (24.1) | 85 (21.7)  | 0.95 (0.66-1.38)   | 0.83 (0.51-1.36) | 20 (19.0)                   | 0.88 (0.47-1.67) | 1.51 (0.63-3.60) | 16 (19.3)                             | 1.10 (0.53-2.30) | 1.77 (0.70-4.47) |
| Quartile 4 (>813.1)                                      | 128 (25.8) | 108 (27.6) | 1.08 (0.75-1.56)   | 0.83 (0.50-1.38) | 41 (39.0)                   | 1.69 (0.97-2.94) | 1.78 (0.75-4.25) | 33 (39.8)                             | 2.13 (1.12-4.05) | 2.40 (0.96-6.02) |
| <i>P</i> for Trend                                       |            |            | 0.84               | 0.89             |                             | 0.02             | <b>0.02</b>      |                                       | 0.01             | <b>0.02</b>      |
| European Americans                                       |            |            |                    |                  |                             |                  |                  |                                       |                  |                  |
| Quartile 1 (<283.5)                                      | 86 (22.8)  | 56 (23.1)  | 1.00               | 1.00             | 6 (17.1)                    | 1.00             | 1.00             | 10 (17.2)                             | 1.00             | 1.00             |
| Quartile 2 (283.5-504.4)                                 | 110 (29.1) | 65 (26.9)  | 0.91 (0.58-1.43)   | 0.94 (0.57-1.53) | 9 (25.7)                    | 1.65 (0.85-3.21) | 1.64 (0.49-5.50) | 13 (22.4)                             | 1.02 (0.43-2.43) | 1.07 (0.43-2.69) |
| Quartile 3 (504.5-813.1)                                 | 106 (28.0) | 68 (28.1)  | 0.99 (0.63-1.55)   | 1.00 (0.60-1.67) | 12 (34.3)                   | 1.64 (0.84-3.18) | 2.68 (0.80-8.96) | 20 (34.5)                             | 1.62 (0.72-3.65) | 1.73 (0.71-4.25) |
| Quartile 4 (>813.1)                                      | 76 (20.1)  | 53 (21.9)  | 0.78 (0.66-1.74)   | 1.10 (0.63-1.92) | 8 (22.9)                    | 1.79 (0.94-3.41) | 1.87 (0.47-7.44) | 15 (25.9)                             | 1.70 (0.72-4.00) | 1.84 (0.69-4.87) |
| <i>P</i> for Trend                                       |            |            | 0.64               | 0.94             |                             | 0.42             | 0.89             |                                       | 0.14             | 0.30             |
| <i>P</i> for Interaction (Dietary Calcium Intake x Race) |            |            |                    | 0.89             |                             |                  | 0.84             |                                       |                  | 0.97             |
| <b><i>Dietary Vitamin D, IU/day</i></b>                  |            |            |                    |                  |                             |                  |                  |                                       |                  |                  |
| African Americans                                        |            |            |                    |                  |                             |                  |                  |                                       |                  |                  |
| Quartile 1 (<29.9)                                       | 116 (23.3) | 80 (20.5)  | 1.00               | 1.00             | 16 (15.2)                   | 1.00             | 1.00             | 13 (15.7)                             | 1.00             | 1.00             |
| Quartile 2 (29.9-71.4)                                   | 123 (24.7) | 104 (26.6) | 1.23 (0.83-1.80)   | 1.07 (0.67-1.72) | 28 (26.7)                   | 1.65 (0.85-3.21) | 1.12 (0.49-2.54) | 20 (24.1)                             | 1.45 (0.69-3.05) | 0.85 (0.34-2.12) |
| Quartile 3 (71.5-148.3)                                  | 124 (24.9) | 96 (24.6)  | 1.12 (0.76-1.66)   | 1.00 (0.59-1.69) | 28 (26.7)                   | 1.64 (0.84-3.18) | 0.91 (0.36-2.27) | 23 (27.7)                             | 1.66 (0.80-3.42) | 0.90 (0.34-2.39) |
| Quartile 4 (>148.3)                                      | 134 (27.0) | 111 (28.4) | 1.20 (0.82-1.76)   | 0.92 (0.50-1.68) | 33 (31.4)                   | 1.79 (0.94-3.41) | 0.67 (0.23-1.90) | 27 (32.5)                             | 1.80 (0.89-3.65) | 0.68 (0.23-2.03) |
| <i>P</i> for Trend                                       |            |            | 0.56               | 0.61             |                             | 0.19             | 0.29             |                                       | 0.15             | 0.58             |
| European Americans                                       |            |            |                    |                  |                             |                  |                  |                                       |                  |                  |
| Quartile 1 (<29.9)                                       | 106 (28.0) | 71 (29.3)  | 1.00               | 1.00             | 8 (22.9)                    | 1.00             | 1.00             | 13 (22.4)                             | 1.00             | 1.00             |

|                                                            |            |           |                  |                  |           |                  |                  |           |                  |                  |
|------------------------------------------------------------|------------|-----------|------------------|------------------|-----------|------------------|------------------|-----------|------------------|------------------|
| Quartile 2 (29.9-71.4)                                     | 106 (28.0) | 51 (21.1) | 0.72 (0.46-1.13) | 0.73 (0.44-1.20) | 9 (25.7)  | 1.13 (0.42-3.03) | 0.85 (0.27-2.61) | 14 (24.1) | 1.08 (0.48-2.40) | 0.91 (0.38-2.14) |
| Quartile 3 (71.5-148.3)                                    | 86 (22.8)  | 71 (29.3) | 1.23 (0.80-1.90) | 1.18 (0.70-2.00) | 12 (34.3) | 1.85 (0.72-4.73) | 1.43 (0.44-4.67) | 18 (31.0) | 1.71 (0.79-3.68) | 1.18 (0.46-3.01) |
| Quartile 4 (>148.3)                                        | 80 (21.2)  | 49 (20.0) | 0.91 (0.57-1.46) | 0.97 (0.53-1.78) | 6 (17.1)  | 0.99 (0.33-2.98) | 0.71 (0.17-3.07) | 13 (22.4) | 1.33 (0.58-3.01) | 1.06 (0.37-3.05) |
| <i>P</i> for Trend                                         |            |           | 0.80             | 0.59             |           | 0.95             | 0.64             |           | 0.43             | 0.82             |
| <i>P</i> for Interaction (Dietary Vitamin D Intake x Race) |            |           |                  | 0.47             |           |                  | 0.84             |           |                  | 0.99             |

***Supplemental Calcium, mg/day***

African Americans

|                    |            |            |                  |                  |           |                  |                         |           |                  |                  |
|--------------------|------------|------------|------------------|------------------|-----------|------------------|-------------------------|-----------|------------------|------------------|
| 0                  | 225 (45.3) | 222 (56.8) | 1.00             | 1.00             | 66 (62.9) | 1.00             | 1.00                    | 49 (59.0) | 1.00             | 1.00             |
| 0-200              | 214 (43.1) | 126 (32.2) | 0.60 (0.45-0.80) | 0.79 (0.51-1.23) | 25 (23.8) | 0.40 (0.24-0.66) | <b>0.41 (0.18-0.95)</b> | 27 (32.5) | 0.58 (0.35-0.96) | 0.75 (0.33-1.70) |
| ≥200               | 58 (11.7)  | 43 (11.0)  | 0.75 (0.49-1.16) | 0.92 (0.51-1.65) | 14 (13.3) | 0.82 (0.43-1.57) | 1.55 (0.56-4.25)        | 7 (8.4)   | 0.55 (0.24-1.29) | 0.79 (0.25-2.54) |
| <i>P</i> for Trend |            |            | 0.15             | 0.99             |           | 0.47             | 0.11                    |           | 0.13             | 0.79             |

European Americans

|                                                               |            |            |                  |                  |           |                  |                   |           |                  |                  |
|---------------------------------------------------------------|------------|------------|------------------|------------------|-----------|------------------|-------------------|-----------|------------------|------------------|
| 0                                                             | 170 (45.0) | 100 (41.3) | 1.00             | 1.00             | 11 (31.4) | 1.00             | 1.00              | 22 (37.9) | 1.00             | 1.00             |
| 0-200                                                         | 146 (38.6) | 106 (43.8) | 1.23 (0.87-1.75) | 1.36 (0.84-2.19) | 14 (40.0) | 1.48 (0.65-3.37) | 2.53 (0.79-8.09)  | 26 (44.8) | 1.38 (0.75-2.53) | 1.75 (0.76-4.00) |
| ≥200                                                          | 62 (16.4)  | 36 (14.9)  | 0.99 (0.61-1.59) | 0.96 (0.53-1.75) | 10 (28.6) | 2.49 (1.01-6.16) | 2.72 (0.74-10.03) | 10 (17.2) | 1.25 (0.56-2.78) | 1.26 (0.44-3.56) |
| <i>P</i> for Trend                                            |            |            | 0.88             | 0.48             |           | 0.05             | 0.32              |           | 0.66             | 0.93             |
| <i>P</i> for Interaction (Supplemental Calcium Intake x Race) |            |            |                  | 0.05             |           |                  | <b>0.01</b>       |           |                  | 0.13             |

***Supplemental Vitamin D, IU/day***

African Americans

|                    |            |            |                  |                         |           |                  |                         |           |                  |                         |
|--------------------|------------|------------|------------------|-------------------------|-----------|------------------|-------------------------|-----------|------------------|-------------------------|
| 0                  | 245 (49.3) | 244 (62.4) | 1.00             | 1.00                    | 73 (69.5) | 1.00             | 1.00                    | 55 (66.3) | 1.00             | 1.00                    |
| 0-400              | 76 (15.3)  | 25 (6.4)   | 0.33 (0.20-0.54) | <b>0.54 (0.30-0.97)</b> | 4 (3.8)   | 0.18 (0.06-0.50) | 0.30 (0.08-1.09)        | 6 (7.2)   | 0.35 (0.15-0.85) | 0.72 (0.25-2.05)        |
| ≥400               | 176 (35.4) | 122 (31.2) | 0.70 (0.52-0.93) | 0.70 (0.48-1.01)        | 28 (26.7) | 0.53 (0.33-0.86) | <b>0.34 (0.18-0.65)</b> | 22 (26.5) | 0.56 (0.33-0.95) | <b>0.44 (0.23-0.86)</b> |
| <i>P</i> for Trend |            |            | 0.03             | 0.06                    |           | 0.02             | <b>0.001</b>            |           | 0.04             | <b>0.02</b>             |

European Americans

|       |            |            |                  |                  |           |                  |                   |           |                  |                  |
|-------|------------|------------|------------------|------------------|-----------|------------------|-------------------|-----------|------------------|------------------|
| 0     | 169 (44.7) | 103 (42.6) | 1.00             | 1.00             | 13 (37.1) | 1.00             | 1.00              | 13 (37.1) | 1.00             | 1.00             |
| 0-400 | 22 (5.8)   | 14 (5.8)   | 1.04 (0.51-2.13) | 1.23 (0.55-2.75) | 3 (8.6)   | 1.77 (0.47-6.71) | 3.17 (0.64-15.59) | 3 (8.6)   | 1.75 (0.60-5.08) | 2.73 (0.81-9.22) |
| ≥400  | 187 (49.5) | 125 (51.7) | 1.10 (0.79-1.53) | 1.24 (0.84-1.82) | 19 (54.3) | 1.32 (0.63-2.76) | 1.94 (0.75-5.05)  | 19 (54.3) | 1.27 (0.71-2.29) | 1.56 (0.77-3.17) |

|                                                                       |      |      |      |             |      |      |
|-----------------------------------------------------------------------|------|------|------|-------------|------|------|
| <i>P</i> for Trend                                                    | 0.59 | 0.22 | 0.52 | 0.20        | 0.49 | 0.27 |
| <i>P</i> for Interaction<br>(Supplemental Vitamin D<br>Intake x Race) |      | 0.10 |      | <b>0.03</b> |      | 0.07 |

NOTE: Model adjusted for age, family history of PCa, BMI, education, smoking, alcohol use, and marital status, as well as mutually adjustment for total calcium or vitamin D intake. In the adjusted model, dietary and supplementary calcium and vitamin D intake simultaneously adjusted for each other. For the analysis of dietary and supplementary calcium intake, total vitamin D intake was adjusted for, while we adjusted for total calcium intake for the analysis of dietary and supplemental vitamin D intake. Significant association is shown with bolded type.
