# Supplementary material for: Race and BMI modify associations of calcium and vitamin D intake with prostate cancer
Source: Springer Nature journal article supplement (doi:10.1186/s12885-017-3060-8), 2017-01-19
Supplement: MOESM3 [file 12008226]

**Supplemental Table 3**  
Index

Association of Dietary Calcium and Vitamin D Intake with Prostate Cancer in Stratified Analysis Based on Body Mass Index

|                                                         | Controls   |           | Cases vs. Controls |                  | NCCN High Risk vs. Controls |                  |                  | Gleason Score $\geq 4+3$ vs. Controls |                  |                  |
|---------------------------------------------------------|------------|-----------|--------------------|------------------|-----------------------------|------------------|------------------|---------------------------------------|------------------|------------------|
|                                                         | n (%)      | n (%)     | Unadjusted         | Adjusted         | n (%)                       | Unadjusted       | Adjusted         | n (%)                                 | Unadjusted       | Adjusted         |
|                                                         |            |           | OR (95% C.I.)      | OR (95% C.I.)    |                             | OR (95% C.I.)    | OR (95% C.I.)    |                                       | OR (95% C.I.)    | OR (95% C.I.)    |
| <b><i>Dietary Calcium, mg/day</i></b>                   |            |           |                    |                  |                             |                  |                  |                                       |                  |                  |
| BMI <Median (28.78)                                     |            |           |                    |                  |                             |                  |                  |                                       |                  |                  |
| Quartile 1 (<283.5)                                     | 96 (22.2)  | 82 (23.6) | 1.00               | 1.00             | 13 (16.3)                   | 1.00             | 1.00             | 10 (13.9)                             | 1.00             | 1.00             |
| Quartile 2 (283.5-504.4)                                | 115 (26.6) | 88 (25.3) | 0.90 (0.60-1.34)   | 0.88 (0.60-1.55) | 20 (25.0)                   | 1.28 (0.61-2.72) | 1.43 (0.58-3.53) | 19 (26.4)                             | 1.59 (0.70-3.57) | 1.51 (0.61-3.73) |
| Quartile 3 (504.5-813.1)                                | 122 (28.2) | 88 (25.3) | 0.84 (0.57-1.26)   | 1.00 (0.62-1.63) | 16 (20.0)                   | 0.97 (0.44-2.11) | 1.70 (0.64-4.47) | 20 (27.8)                             | 1.57 (0.70-3.52) | 2.33 (0.92-5.89) |
| Quartile 4 (>813.1)                                     | 99 (22.9)  | 90 (25.9) | 1.06 (0.71-1.60)   | 0.98 (0.58-1.65) | 31 (38.8)                   | 2.31 (1.14-4.68) | 2.17 (0.83-5.69) | 23 (31.9)                             | 2.23 (1.01-4.93) | 2.35 (0.91-6.12) |
| <i>P</i> for Trend                                      |            |           | 0.62               | 0.96             |                             | 0.01             | <b>0.049</b>     |                                       | 0.06             | 0.06             |
| BMI $\geq$ Median (28.78)                               |            |           |                    |                  |                             |                  |                  |                                       |                  |                  |
| Quartile 1 (<283.5)                                     | 118 (25.3) | 89 (27.3) | 1.00               | 1.00             | 18 (25.7)                   | 1.00             | 1.00             | 17 (22.1)                             | 1.00             | 1.00             |
| Quartile 2 (283.5-504.4)                                | 119 (25.5) | 76 (23.6) | 0.85 (0.57-1.26)   | 0.82 (0.53-1.27) | 11 (15.7)                   | 0.61 (0.27-1.34) | 0.54 (0.23-1.31) | 13 (16.9)                             | 0.76 (0.35-1.63) | 0.65 (0.29-1.48) |
| Quartile 3 (504.5-813.1)                                | 113 (24.2) | 78 (23.3) | 0.92 (0.61-1.36)   | 0.94 (0.59-1.51) | 18 (25.7)                   | 1.04 (0.52-2.11) | 1.39 (0.58-3.36) | 17 (22.1)                             | 1.04 (0.51-2.15) | 1.18 (0.53-2.65) |
| Quartile 4 (>813.1)                                     | 117 (25.1) | 91 (25.8) | 1.03 (0.70-1.52)   | 0.99 (0.62-1.59) | 23 (32.9)                   | 1.29 (0.66-2.51) | 1.13 (0.46-2.75) | 30 (39.0)                             | 1.78 (0.93-3.40) | 1.51 (0.69-3.30) |
| <i>P</i> for Trend                                      |            |           | 0.65               | 0.87             |                             | 0.18             | 0.48             |                                       | 0.02             | 0.12             |
| <i>P</i> for Interaction (Dietary Calcium Intake x BMI) |            |           |                    | 0.97             |                             |                  | 0.57             |                                       |                  | 0.77             |
| <b><i>Dietary Vitamin D, IU/day</i></b>                 |            |           |                    |                  |                             |                  |                  |                                       |                  |                  |
| BMI <Median (28.78)                                     |            |           |                    |                  |                             |                  |                  |                                       |                  |                  |
| Quartile 1 (<29.9)                                      | 107 (24.8) | 82 (23.6) | 1.00               | 1.00             | 14 (17.5)                   | 1.00             | 1.00             | 14 (19.4)                             | 1.00             | 1.00             |
| Quartile 2 (29.9-71.4)                                  | 101 (23.4) | 87 (25.0) | 1.12 (0.75-1.69)   | 1.03 (0.65-1.65) | 22 (27.5)                   | 1.67 (0.81-3.43) | 1.45 (0.61-3.47) | 19 (26.4)                             | 1.44 (0.69-3.02) | 1.19 (0.51-2.77) |
| Quartile 3 (71.5-148.3)                                 | 107 (24.8) | 93 (26.7) | 1.13 (0.76-1.69)   | 1.09 (0.67-1.79) | 22 (27.5)                   | 1.57 (0.76-3.23) | 1.23 (0.49-3.08) | 20 (27.8)                             | 1.43 (0.69-2.98) | 1.16 (0.48-2.83) |
| Quartile 4 (>148.3)                                     | 117 (27.1) | 86 (24.7) | 0.96 (0.64-1.43)   | 0.61 (0.34-1.08) | 22 (27.5)                   | 1.44 (0.70-2.95) | 0.42 (0.14-1.26) | 19 (26.4)                             | 1.24 (0.59-2.60) | 0.55 (0.20-1.55) |
| <i>P</i> for Trend                                      |            |           | 0.64               | 0.06             |                             | 0.65             | <b>0.03</b>      |                                       | 0.84             | 0.14             |
| BMI $\geq$ Median (28.78)                               |            |           |                    |                  |                             |                  |                  |                                       |                  |                  |
| Quartile 1 (<29.9)                                      | 127 (27.2) | 79 (23.7) | 1.00               | 1.00             | 11 (15.7)                   | 1.00             | 1.00             | 14 (18.2)                             | 1.00             | 1.00             |

|                                                           |            |           |                  |                  |           |                         |                  |           |                  |                  |
|-----------------------------------------------------------|------------|-----------|------------------|------------------|-----------|-------------------------|------------------|-----------|------------------|------------------|
| Quartile 2 (29.9-71.4)                                    | 124 (26.6) | 76 (22.8) | 0.99 (0.66-1.47) | 0.94 (0.60-1.47) | 15 (21.4) | 1.40 (0.62-3.16)        | 1.15 (0.46-2.84) | 15 (19.5) | 1.10 (0.51-2.37) | 0.83 (0.36-1.89) |
| Quartile 3 (71.5-148.3)                                   | 107 (22.9) | 88 (26.3) | 1.32 (0.89-1.97) | 1.23 (0.75-2.04) | 24 (34.3) | <b>2.59 (1.21-5.53)</b> | 1.88 (0.69-5.11) | 24 (31.2) | 2.04 (1.01-4.13) | 1.37 (0.55-3.39) |
| Quartile 4 (>148.3)                                       | 109 (23.3) | 91 (27.2) | 1.34 (0.90-1.99) | 1.65 (0.93-2.94) | 20 (28.6) | 2.12 (0.97-4.62)        | 1.81 (0.46-1.72) | 24 (31.2) | 2.00 (0.99-4.05) | 1.54 (0.57-4.18) |
| <i>P</i> for Trend                                        |            |           | 0.08             | <b>0.03</b>      |           | 0.06                    | 0.29             |           | 0.03             | 0.15             |
| <i>P</i> for Interaction (Dietary Vitamin D Intake x BMI) |            |           |                  | 0.17             |           |                         | 0.31             |           |                  | 0.37             |

***Supplemental Calcium, mg/day***

BMI <Median (28.78)

|                    |            |            |                  |                  |           |                  |                  |           |                  |                  |
|--------------------|------------|------------|------------------|------------------|-----------|------------------|------------------|-----------|------------------|------------------|
| 0                  | 188 (43.5) | 188 (54.0) | 1.00             | 1.00             | 47 (58.8) | 1.00             | 1.00             | 41 (56.9) | 1.00             | 1.00             |
| 0-200              | 169 (39.1) | 118 (33.9) | 0.70 (0.51-0.95) | 0.80 (0.51-1.25) | 25 (31.3) | 0.59 (0.35-1.00) | 0.74 (0.32-1.71) | 25 (34.7) | 0.68 (0.40-1.16) | 0.96 (0.47-1.96) |
| ≥200               | 75 (17.4)  | 42 (12.1)  | 0.56 (0.37-0.86) | 0.62 (0.35-1.09) | 8 (10.0)  | 0.43 (0.19-0.95) | 0.82 (0.26-2.63) | 6 (8.3)   | 0.37 (0.15-0.90) | 0.50 (0.18-1.44) |
| <i>P</i> for Trend |            |            | 0.009            | 0.13             |           | 0.04             | 0.62             |           | 0.03             | 0.15             |

BMI ≥ Median (28.78)

|                    |            |            |                  |                  |           |                  |                         |           |                  |                  |
|--------------------|------------|------------|------------------|------------------|-----------|------------------|-------------------------|-----------|------------------|------------------|
| 0                  | 222 (47.5) | 161 (48.2) | 1.00             | 1.00             | 36 (51.4) | 1.00             | 1.00                    | 34 (44.2) | 1.00             | 1.00             |
| 0-200              | 192 (41.1) | 125 (37.4) | 0.90 (0.66-1.22) | 1.05 (0.68-1.61) | 17 (24.3) | 0.55 (0.30-1.00) | 0.83 (0.34-2.01)        | 29 (37.7) | 0.99 (0.58-1.68) | 1.22 (0.57-2.61) |
| ≥200               | 53 (11.3)  | 48(14.4)   | 1.25 (0.80-1.94) | 1.27 (0.73-2.23) | 17 (24.3) | 1.98 (1.03-3.79) | <b>3.33 (1.23-9.06)</b> | 14 (18.2) | 1.73 (0.86-3.44) | 1.80 (0.70-4.62) |
| <i>P</i> for Trend |            |            | 0.32             | 0.49             |           | 0.03             | <b>0.005</b>            |           | 0.12             | 0.29             |

*P* for Interaction (Supplemental Calcium Intake x BMI)

0.05 **0.007** **0.01**

***Supplemental Vitamin D, IU/day***

BMI <Median (28.78)

|                    |            |            |                  |                         |           |                  |                         |           |                  |                         |
|--------------------|------------|------------|------------------|-------------------------|-----------|------------------|-------------------------|-----------|------------------|-------------------------|
| 0                  | 191 (44.2) | 198 (56.9) | 1.00             | 1.00                    | 50 (62.5) | 1.00             | 1.00                    | 45 (62.5) | 1.00             | 1.00                    |
| 0-400              | 49 (11.3)  | 20 (5.7)   | 0.39 (0.23-0.69) | <b>0.52 (0.27-0.98)</b> | 3 (3.8)   | 0.23 (0.07-0.78) | 0.32 (0.08-1.22)        | 3 (4.3)   | 0.26 (0.08-0.87) | 0.35 (0.10-1.27)        |
| ≥400               | 192 (44.4) | 130 (37.4) | 0.65 (0.49-0.88) | <b>0.69 (0.48-0.99)</b> | 27 (33.8) | 0.54 (0.32-0.89) | <b>0.44 (0.22-0.86)</b> | 24 (33.3) | 0.53 (0.31-0.91) | <b>0.43 (0.22-0.83)</b> |
| <i>P</i> for Trend |            |            | 0.01             | 0.06                    |           | 0.03             | <b>0.02</b>             |           | 0.03             | <b>0.02</b>             |

BMI ≥ Median (28.78)

|       |            |            |                  |                  |           |                  |                  |           |                  |                  |
|-------|------------|------------|------------------|------------------|-----------|------------------|------------------|-----------|------------------|------------------|
| 0     | 243 (52.0) | 179 (53.6) | 1.00             | 1.00             | 41 (58.6) | 1.00             | 1.00             | 35 (45.5) | 1.00             | 1.00             |
| 0-400 | 39 (8.4)   | 18 (5.4)   | 0.63 (0.35-1.13) | 0.82 (0.43-1.56) | 4 (5.7)   | 0.61 (0.21-1.79) | 1.29 (0.40-4.21) | 7 (9.1)   | 1.25 (0.52-3.00) | 2.45 (0.93-6.44) |
| ≥400  | 185 (39.6) | 137 (41.0) | 1.01 (0.75-1.35) | 1.09 (0.78-1.54) | 25 (35.7) | 0.80 (0.47-1.37) | 0.89 (0.46-1.72) | 35 (45.5) | 1.31 (0.79-2.18) | 1.35 (0.74-2.45) |

|                                                                      |      |      |      |      |      |             |
|----------------------------------------------------------------------|------|------|------|------|------|-------------|
| <i>P</i> for Trend                                                   | 0.87 | 0.53 | 0.45 | 0.70 | 0.30 | 0.35        |
| <i>P</i> for Interaction<br>(Supplemental Vitamin D<br>Intake x BMI) |      | 0.16 |      | 0.22 |      | <b>0.01</b> |

NOTE: Model adjusted for age, family history of PCa, race/ethnicity, education, smoking, alcohol use, and marital status, as well as mutually adjustment for total calcium or vitamin D intake. In the adjusted model, dietary and supplementary calcium and vitamin D intake simultaneously adjusted for each other. For the analysis of dietary and supplementary calcium intake, total vitamin D intake was adjusted for, while we adjusted for total calcium intake for the analysis of dietary and supplemental vitamin D intake. Significant association is shown with bolded type.
