# Supplementary material for: Race and BMI modify associations of calcium and vitamin D intake with prostate cancer
Source: Springer Nature journal article supplement (doi:10.1186/s12885-017-3060-8), 2017-01-19
Supplement: MOESM4 [file 12008226]

**Supplemental Table 4** Association of Total Calcium and Vitamin D Intake with Prostate Cancer in Stratified Analysis Based on Body Mass Index in African Americans and European Americans

|                                                       | African American |           |                  |                         | European Americans |           |                  |                  |
|-------------------------------------------------------|------------------|-----------|------------------|-------------------------|--------------------|-----------|------------------|------------------|
|                                                       | Controls         | Cases     | Unadjusted       | Adjusted                | Controls           | Cases     | Unadjusted       | Adjusted         |
|                                                       | n (%)            | n (%)     | OR (95% C.I.)    | OR (95% C.I.)           | n (%)              | n (%)     | OR (95% C.I.)    | OR (95% C.I.)    |
| <b>Total Calcium, mg/day</b>                          |                  |           |                  |                         |                    |           |                  |                  |
| BMI <Median (27.8)                                    |                  |           |                  |                         |                    |           |                  |                  |
| Quartile 1 (<368.8)                                   | 54 (27.0)        | 57 (27.9) | 1.00             | 1.00                    | 32 (16.3)          | 28 (24.8) | 1.00             | 1.00             |
| Quartile 2 (368.8-616.0)                              | 45 (22.5)        | 40 (19.6) | 0.84 (0.48-1.48) | 1.09 (0.51-2.34)        | 68 (34.7)          | 28 (24.8) | 0.47 (0.24-0.92) | 0.52 (0.24-1.10) |
| Quartile 3 (616.1-1033.3)                             | 51 (25.5)        | 48 (23.5) | 0.89 (0.52-1.53) | 1.18 (0.55-2.51)        | 50 (25.5)          | 33 (29.2) | 0.75 (0.39-1.48) | 0.84 (0.38-1.86) |
| Quartile 4 (>1033.3)                                  | 50 (25.0)        | 59 (28.9) | 1.12 (0.66-1.90) | 2.23 (0.98-2.06)        | 46 (23.5)          | 24 (21.2) | 0.60 (0.29-1.21) | 0.60 (0.26-1.40) |
| <i>P</i> for Trend                                    |                  |           | 0.56             | <b>0.04</b>             |                    |           | 0.53             | 0.44             |
| BMI ≥ Median (27.8)                                   |                  |           |                  |                         |                    |           |                  |                  |
| Quartile 1 (<368.8)                                   | 73 (29.1)        | 51 (28.8) | 1.00             | 1.00                    | 45 (25.4)          | 25 (20.5) | 1.00             | 1.00             |
| Quartile 2 (368.8-616.0)                              | 57 (22.7)        | 47 (26.3) | 1.18 (0.70-2.00) | 0.86 (0.45-1.65)        | 47 (26.6)          | 31 (25.4) | 1.19 (0.61-2.31) | 1.29 (0.62-2.67) |
| Quartile 3 (616.1-1033.3)                             | 62 (24.7)        | 43 (24.0) | 0.99 (0.59-1.68) | 1.26 (0.63-2.52)        | 36 (20.3)          | 38 (31.1) | 1.90 (0.97-3.71) | 1.66 (0.77-3.57) |
| Quartile 4 (>1033.3)                                  | 59 (23.5)        | 38 (21.2) | 0.92 (0.54-1.59) | 0.65 (0.39-1.80)        | 49 (27.7)          | 28 (23.0) | 1.03 (0.52-2.02) | 0.87 (0.39-1.95) |
| <i>P</i> for Trend                                    |                  |           | 0.62             | 0.86                    |                    |           | 0.89             | 0.54             |
| <i>P</i> for Interaction (Total Calcium Intake x BMI) |                  |           |                  | 0.47                    |                    |           |                  | 0.24             |
| <b>Total Vitamin D, IU/day</b>                        |                  |           |                  |                         |                    |           |                  |                  |
| BMI <Median (27.8)                                    |                  |           |                  |                         |                    |           |                  |                  |
| Quartile 1 (<63.5)                                    | 42 (21.0)        | 57 (27.9) | 1.00             | 1.00                    | 37 (18.9)          | 27 (23.9) | 1.00             | 1.00             |
| Quartile 2 (63.5-239.2)                               | 60 (30.0)        | 61 (29.9) | 0.75 (0.44-1.28) | 0.76 (0.36-1.60)        | 42 (21.4)          | 23 (20.4) | 0.68 (0.36-1.28) | 0.77 (0.33-1.78) |
| Quartile 3 (239.3-510.2)                              | 51 (25.5)        | 55 (27.0) | 0.80 (0.46-1.38) | 0.68 (0.32-1.47)        | 47 (24.0)          | 26 (23.0) | 0.87 (0.47-1.60) | 0.95 (0.42-2.15) |
| Quartile 4 (>510.2)                                   | 47 (23.5)        | 31 (15.2) | 0.49 (0.27-0.89) | <b>0.29 (0.12-0.72)</b> | 70 (35.7)          | 37 (32.7) | 0.61 (0.31-1.21) | 0.87 (0.40-1.93) |
| <i>P</i> for Trend                                    |                  |           | 0.04             | <b>0.006</b>            |                    |           | 0.47             | 0.99             |
| BMI ≥ Median (27.8)                                   |                  |           |                  |                         |                    |           |                  |                  |
| Total Vitamin D, IU/day                               |                  |           |                  |                         |                    |           |                  |                  |

|                                                            |           |           |                  |                  |           |           |                  |                  |
|------------------------------------------------------------|-----------|-----------|------------------|------------------|-----------|-----------|------------------|------------------|
| Quartile 1 (<63.5)                                         | 64 (25.5) | 50 (27.9) | 1.00             | 1.00             | 49 (27.7) | 28 (23.0) | 1.00             | 1.00             |
| Quartile 2 (63.5-239.2)                                    | 64 (25.5) | 51 (28.5) | 1.02 (0.61-1.72) | 0.99 (0.51-1.95) | 37 (20.9) | 21 (17.2) | 0.68 (0.36-1.32) | 0.87 (0.40-1.93) |
| Quartile 3 (239.3-510.2)                                   | 71 (28.3) | 42 (23.5) | 0.76 (0.45-1.29) | 0.85 (0.43-1.70) | 41 (23.2) | 25 (20.5) | 1.75 (0.92-3.30) | 1.04 (0.49-2.22) |
| Quartile 4 (>510.2)                                        | 52 (20.7) | 36 (20.1) | 0.89 (0.50-1.56) | 0.88 (0.40-1.91) | 50 (28.2) | 48 (39.3) | 1.29 (0.67-2.49) | 1.86 (0.89-3.90) |
| <i>P</i> for Trend                                         |           |           | 0.49             | 0.62             |           |           | 0.05             | <b>0.03</b>      |
| <i>P</i> for Interaction (Total<br>Vitamin D Intake x BMI) |           |           |                  | 0.56             |           |           |                  | 0.22             |

NOTE: Model adjusted for age, family history of PCa, education, smoking, alcohol use, and marital status as well as mutually adjustment for total calcium or vitamin D intake. Significant association is shown with bolded type.
