# Supplementary material for: Race and BMI modify associations of calcium and vitamin D intake with prostate cancer
Source: Springer Nature journal article supplement (doi:10.1186/s12885-017-3060-8), 2017-01-19
Supplement: MOESM5 [file 12008226]

**Supplemental Table 5**  
Race

Institute of Medicine (IOM) Calcium and Vitamin D Dietary Reference Intakes and Prostate Cancer Stratified Based on

|                                                              | Controls   |            | Cases vs. Controls |                         | NCCN High Risk vs. Controls |                  |                         | Gleason Score $\geq 4+3$ vs. Controls |                  |                         |
|--------------------------------------------------------------|------------|------------|--------------------|-------------------------|-----------------------------|------------------|-------------------------|---------------------------------------|------------------|-------------------------|
|                                                              | n (%)      | n (%)      | Unadjusted         | Adjusted                | n (%)                       | Unadjusted       | Adjusted                | n (%)                                 | Unadjusted       | Adjusted                |
|                                                              |            |            | OR (95% C.I.)      | OR (95% C.I.)           |                             | OR (95% C.I.)    | OR (95% C.I.)           |                                       | OR (95% C.I.)    | OR (95% C.I.)           |
| Total Calcium, mg/day                                        |            |            |                    |                         |                             |                  |                         |                                       |                  |                         |
| <i>African Americans</i>                                     |            |            |                    |                         |                             |                  |                         |                                       |                  |                         |
| <800                                                         | 331 (66.6) | 247 (63.2) | 1.00               | 1.00                    | 57 (54.3)                   | 1.00             | 1.00                    | 44 (53.0)                             | 1.00             | 1.00                    |
| 800-1000                                                     | 41 (8.2)   | 43 (11.0)  | 1.41 (0.89-2.22)   | 1.52 (0.88-2.62)        | 12 (11.4)                   | 1.70 (0.84-3.43) | 1.88 (0.81-4.41)        | 13 (15.7)                             | 2.39 (1.19-4.80) | <b>2.81 (1.26-6.29)</b> |
| $\geq 1000$                                                  | 125 (25.2) | 101 (25.8) | 1.08 (0.79-1.48)   | 1.10 (0.73-1.66)        | 36 (34.3)                   | 1.67 (1.05-2.66) | 1.76 (0.91-3.38)        | 26 (31.3)                             | 1.57 (0.92-2.65) | 1.82 (0.91-3.66)        |
| <i>P</i>                                                     |            |            | 0.34               | 0.32                    |                             | 0.06             | 0.13                    |                                       | 0.03             | <b>0.03</b>             |
| <i>European Americans</i>                                    |            |            |                    |                         |                             |                  |                         |                                       |                  |                         |
| <800                                                         | 245 (64.8) | 145 (59.9) | 1.00               | 1.00                    | 19 (54.3)                   | 1.00             | 1.00                    | 30 (51.7)                             | 1.00             | 1.00                    |
| 800-1000                                                     | 31 (8.2)   | 38 (15.7)  | 2.07 (1.24-3.47)   | <b>1.83 (1.05-3.18)</b> | 3 (8.6)                     | 1.25 (0.35-4.46) | 1.04 (0.25-4.29)        | 9 (15.5)                              | 2.37 (1.03-5.46) | 2.02 (0.78-5.23)        |
| $\geq 1000$                                                  | 102 (27.0) | 59 (24.4)  | 0.98 (0.67-1.43)   | 0.91 (0.60-1.40)        | 13 (37.1)                   | 1.64 (0.78-3.45) | 1.30 (0.54-3.13)        | 19 (32.8)                             | 1.52 (0.82-2.83) | 1.37 (0.68-2.74)        |
| <i>P</i>                                                     |            |            | 0.02               | 0.07                    |                             | 0.42             | 0.84                    |                                       | 0.09             | 0.31                    |
| <i>P</i> for Interaction<br>(Total Calcium Intake<br>x Race) |            |            |                    | 0.76                    |                             |                  | 0.82                    |                                       |                  | 0.93                    |
| Total Vitamin D, IU/day                                      |            |            |                    |                         |                             |                  |                         |                                       |                  |                         |
| <i>African Americans</i>                                     |            |            |                    |                         |                             |                  |                         |                                       |                  |                         |
| <400                                                         | 304 (61.2) | 253 (64.7) | 1.00               | 1.00                    | 69 (65.7)                   | 1.00             | 1.00                    | 54 (65.1)                             | 1.00             | 1.00                    |
| 400-600                                                      | 113 (22.7) | 92 (23.5)  | 0.98 (0.71-1.35)   | 0.92 (0.62-1.37)        | 29 (27.6)                   | 1.13 (0.70-1.84) | 0.82 (0.44-1.52)        | 22 (26.5)                             | 1.10 (0.64-1.88) | 1.05 (0.55-1.99)        |
| $\geq 600$                                                   | 80 (16.1)  | 46 (11.8)  | 0.69 (0.46-1.03)   | <b>0.59 (0.36-0.98)</b> | 7 (6.7)                     | 0.39 (0.17-0.87) | <b>0.20 (0.07-0.57)</b> | 7 (8.4)                               | 0.49 (0.22-1.12) | <b>0.27 (0.09-0.80)</b> |
| <i>P</i>                                                     |            |            | 0.19               | 0.13                    |                             | 0.05             | <b>0.01</b>             |                                       | 0.20             | <b>0.05</b>             |
| <i>European Americans</i>                                    |            |            |                    |                         |                             |                  |                         |                                       |                  |                         |
| <400                                                         | 188 (49.7) | 116 (47.9) | 1.00               | 1.00                    | 16 (45.7)                   | 1.00             | 1.00                    | 27 (46.6)                             | 1.00             | 1.00                    |
| 400-600                                                      | 81 (21.4)  | 66 (27.3)  | 1.32 (0.89-1.97)   | 1.39 (0.90-2.15)        | 10 (28.6)                   | 1.45 (0.63-3.33) | 2.14 (0.80-5.73)        | 15 (25.9)                             | 1.29 (0.65-2.55) | 1.48 (0.69-3.17)        |
| $\geq 600$                                                   | 109 (28.8) | 60 (24.8)  | 0.89 (0.60-1.32)   | 1.03 (0.67-1.60)        | 9 (25.7)                    | 0.97 (0.42-2.27) | 1.35 (0.49-3.73)        | 16 (27.6)                             | 1.02 (0.53-1.98) | 1.12 (0.52-2.42)        |
| <i>P</i>                                                     |            |            | 0.21               | 0.30                    |                             | 0.62             | 0.31                    |                                       | 0.75             | 0.60                    |

*P* for Interaction  
(Total Vitamin D  
Intake x Race)

0.41

0.17

0.24

---

NOTE: Model adjusted for age, family history of PCa, BMI, education, smoking, alcohol use, and marital status, as well as mutually adjustment for total calcium or vitamin D intake. The IOM EAR for calcium intake is 800 mg/day and for vitamin D intake is 400 IU/day. The RDA for calcium is 1,000 mg/day and for vitamin D is 600 IU/day. Significant association is shown with bolded type.
